# Supplementary material for: Vitamin D Knowledge, Attitudes, and Behaviors in Young Danish Women with a Non-Western Ethnic Minority Background—A Questionnaire Survey
Source: PubMed Central journal article supplement (PMC7662621; doi:10.3390/ijerph17218053), 2020-11-01
Supplement: ijerph-17-08053-s001.pdf [file ijerph-17-08053-s001.pdf]

## 1. Country of origin of participants' parents

### Country of mother's origin

| Country              | Frequency | Percent |
|----------------------|-----------|---------|
| Turkey               | 47        | 18.5    |
| Somalia              | 25        | 9.8     |
| Libanon              | 8         | 3.1     |
| Iraq                 | 7         | 2.8     |
| Afghanistan          | 6         | 2.4     |
| Morocco              | 5         | 2.0     |
| Pakistan             | 5         | 2.0     |
| Iran                 | 3         | 1.2     |
| Bosnia               | 2         | 0.8     |
| Vietnam              | 2         | 0.8     |
| Algeria              | 1         | 0.4     |
| United Arab Emirates | 1         | 0.4     |
| Kenya                | 1         | 0.4     |
| Montenegro           | 1         | 0.4     |
| Qatar                | 1         | 0.4     |
| Germany              | 1         | 0.4     |
| Missing              | 138       | 54.3    |
| Total                | 254       | 100     |

### Country of father's origin

| Country     | Frequency | Percent |
|-------------|-----------|---------|
| Turkey      | 45        | 17.7    |
| Somalia     | 25        | 9.8     |
| Iraq        | 10        | 3.9     |
| Lebanon     | 8         | 3.1     |
| Afghanistan | 6         | 2.4     |
| Morocco     | 4         | 1.6     |
| Pakistan    | 3         | 1.2     |
| Bosnia      | 2         | 0.8     |
| Iran        | 2         | 0.8     |
| Algeria     | 1         | 0.4     |
| Burma       | 1         | 0.4     |
| Dubai       | 1         | 0.4     |
| Egypt       | 1         | 0.4     |
| Ethiopia    | 1         | 0.4     |
| Kenya       | 1         | 0.4     |
| Kina        | 1         | 0.4     |
| Macedonia   | 1         | 0.4     |
| Montenegro  | 1         | 0.4     |
| Uganda      | 1         | 0.4     |
| Vietnam     | 1         | 0.4     |
| Missing     | 137       | 53.9    |
| Total       | 254       | 100     |

## 2. Multiple Comparisons, Age groups

Bonferroni test

| Dependent Variable  | Age I | Age J | Mean Difference | Std. Error | Sig.  | 95% Confidence Interval |             |
|---------------------|-------|-------|-----------------|------------|-------|-------------------------|-------------|
|                     |       |       | (I-J)           |            |       | Lower Bound             | Upper Bound |
| General knowledge   | 0-18  | 19-25 | -5,88983        | 4,03961    | 1,000 | -17,3311                | 5,5514      |
|                     |       | 26-35 | -5,59859        | 4,14275    | 1,000 | -17,3320                | 6,1348      |
|                     |       | 36-45 | -3,96341        | 4,32582    | 1,000 | -16,2153                | 8,2885      |
|                     |       | 46-60 | -6,07143        | 5,07829    | 1,000 | -20,4545                | 8,3116      |
|                     | 19-25 | 0-18  | 5,88983         | 4,03961    | 1,000 | -5,5514                 | 17,3311     |
|                     |       | 26-35 | ,29124          | 1,84220    | 1,000 | -4,9264                 | 5,5088      |
|                     |       | 36-45 | 1,92642         | 2,22352    | 1,000 | -4,3712                 | 8,2240      |
|                     |       | 46-60 | -,18160         | 3,46703    | 1,000 | -10,0012                | 9,6380      |
|                     | 26-35 | 0-18  | 5,59859         | 4,14275    | 1,000 | -6,1348                 | 17,3320     |
|                     |       | 19-25 | -,29124         | 1,84220    | 1,000 | -5,5088                 | 4,9264      |
|                     |       | 36-45 | 1,63518         | 2,40582    | 1,000 | -5,1788                 | 8,4491      |
|                     |       | 46-60 | -,47284         | 3,58667    | 1,000 | -10,6313                | 9,6856      |
|                     | 36-45 | 0-18  | 3,96341         | 4,32582    | 1,000 | -8,2885                 | 16,2153     |
|                     |       | 19-25 | -1,92642        | 2,22352    | 1,000 | -8,2240                 | 4,3712      |
|                     |       | 26-35 | -1,63518        | 2,40582    | 1,000 | -8,4491                 | 5,1788      |
|                     |       | 46-60 | -2,10801        | 3,79665    | 1,000 | -12,8612                | 8,6451      |
|                     | 46-60 | 0-18  | 6,07143         | 5,07829    | 1,000 | -8,3116                 | 20,4545     |
|                     |       | 19-25 | ,18160          | 3,46703    | 1,000 | -9,6380                 | 10,0012     |
|                     |       | 26-35 | ,47284          | 3,58667    | 1,000 | -9,6856                 | 10,6313     |
|                     |       | 36-45 | 2,10801         | 3,79665    | 1,000 | -8,6451                 | 12,8612     |
| Nutrition knowledge | 0-18  | 19-25 | -4,62712        | 7,41560    | 1,000 | -25,6301                | 16,3758     |
|                     |       | 26-35 | -11,92958       | 7,60494    | 1,000 | -33,4688                | 9,6096      |
|                     |       | 36-45 | -11,87805       | 7,94100    | 1,000 | -34,3691                | 10,6130     |
|                     |       | 46-60 | -4,14286        | 9,32232    | 1,000 | -30,5461                | 22,2604     |
|                     | 19-25 | 0-18  | 4,62712         | 7,41560    | 1,000 | -16,3758                | 25,6301     |

|           |       |       |           |         |             |          |         |
|-----------|-------|-------|-----------|---------|-------------|----------|---------|
|           |       | 26-35 | -7,30246  | 3,38176 | ,318        | -16,8805 | 2,2756  |
|           |       | 36-45 | -7,25093  | 4,08176 | ,769        | -18,8116 | 4,3097  |
|           |       | 46-60 | ,48426    | 6,36450 | 1,000       | -17,5417 | 18,5102 |
|           | 26-35 | 0-18  | 11,92958  | 7,60494 | 1,000       | -9,6096  | 33,4688 |
|           |       | 19-25 | 7,30246   | 3,38176 | ,318        | -2,2756  | 16,8805 |
|           |       | 36-45 | ,05153    | 4,41642 | 1,000       | -12,4569 | 12,5600 |
|           |       | 46-60 | 7,78672   | 6,58413 | 1,000       | -10,8613 | 26,4347 |
|           | 36-45 | 0-18  | 11,87805  | 7,94100 | 1,000       | -10,6130 | 34,3691 |
|           |       | 19-25 | 7,25093   | 4,08176 | ,769        | -4,3097  | 18,8116 |
|           |       | 26-35 | -,05153   | 4,41642 | 1,000       | -12,5600 | 12,4569 |
|           |       | 46-60 | 7,73519   | 6,96960 | 1,000       | -12,0046 | 27,4750 |
|           | 46-60 | 0-18  | 4,14286   | 9,32232 | 1,000       | -22,2604 | 30,5461 |
|           |       | 19-25 | -,48426   | 6,36450 | 1,000       | -18,5102 | 17,5417 |
|           |       | 26-35 | -7,78672  | 6,58413 | 1,000       | -26,4347 | 10,8613 |
|           |       | 36-45 | -7,73519  | 6,96960 | 1,000       | -27,4750 | 12,0046 |
| Attitudes | 0-18  | 19-25 | 7,70571*  | 2,55101 | <b>,028</b> | ,4776    | 14,9339 |
|           |       | 26-35 | 7,42995*  | 2,60859 | ,048        | ,0387    | 14,8213 |
|           |       | 36-45 | 7,49444   | 2,71551 | ,062        | -,1998   | 15,1887 |
|           |       | 46-60 | 3,87302   | 3,14473 | 1,000       | -5,0374  | 12,7834 |
|           | 19-25 | 0-18  | -7,70571* | 2,55101 | <b>,028</b> | -14,9339 | -,4776  |
|           |       | 26-35 | -,27575   | 1,12838 | 1,000       | -3,4730  | 2,9214  |
|           |       | 36-45 | -,21126   | 1,35738 | 1,000       | -4,0573  | 3,6348  |
|           |       | 46-60 | -3,83269  | 2,08754 | ,676        | -9,7476  | 2,0822  |
|           | 26-35 | 0-18  | -7,42995* | 2,60859 | <b>,048</b> | -14,8213 | -,0387  |
|           |       | 19-25 | ,27575    | 1,12838 | 1,000       | -2,9214  | 3,4730  |
|           |       | 36-45 | ,06449    | 1,46273 | 1,000       | -4,0801  | 4,2090  |
|           |       | 46-60 | -3,55694  | 2,15752 | 1,000       | -9,6702  | 2,5563  |
|           | 36-45 | 0-18  | -7,49444  | 2,71551 | ,062        | -15,1887 | ,1998   |
|           |       | 19-25 | ,21126    | 1,35738 | 1,000       | -3,6348  | 4,0573  |

|          |       |       |          |         |             |          |         |
|----------|-------|-------|----------|---------|-------------|----------|---------|
|          |       | 26-35 | -,06449  | 1,46273 | 1,000       | -4,2090  | 4,0801  |
|          |       | 46-60 | -3,62143 | 2,28564 | 1,000       | -10,0977 | 2,8548  |
|          | 46-60 | 0-18  | -3,87302 | 3,14473 | 1,000       | -12,7834 | 5,0374  |
|          |       | 19-25 | 3,83269  | 2,08754 | ,676        | -2,0822  | 9,7476  |
|          |       | 26-35 | 3,55694  | 2,15752 | 1,000       | -2,5563  | 9,6702  |
|          |       | 36-45 | 3,62143  | 2,28564 | 1,000       | -2,8548  | 10,0977 |
| Behavior | 0-18  | 19-25 | -2,50000 | 2,82445 | 1,000       | -10,5045 | 5,5045  |
|          |       | 26-35 | -3,45752 | 2,88765 | 1,000       | -11,6412 | 4,7261  |
|          |       | 36-45 | -5,40171 | 3,01052 | ,741        | -13,9336 | 3,1302  |
|          |       | 46-60 | -8,93651 | 3,47819 | ,108        | -18,7938 | ,9207   |
|          | 19-25 | 0-18  | 2,50000  | 2,82445 | 1,000       | -5,5045  | 10,5045 |
|          |       | 26-35 | -,95752  | 1,26027 | 1,000       | -4,5291  | 2,6141  |
|          |       | 36-45 | -2,90171 | 1,52086 | ,576        | -7,2118  | 1,4084  |
|          |       | 46-60 | -6,43651 | 2,31248 | <b>,058</b> | -12,9901 | ,1171   |
|          | 26-35 | 0-18  | 3,45752  | 2,88765 | 1,000       | -4,7261  | 11,6412 |
|          |       | 19-25 | ,95752   | 1,26027 | 1,000       | -2,6141  | 4,5291  |
|          |       | 36-45 | -1,94419 | 1,63523 | 1,000       | -6,5785  | 2,6901  |
|          |       | 46-60 | -5,47899 | 2,38926 | ,227        | -12,2502 | 1,2922  |
|          | 36-45 | 0-18  | 5,40171  | 3,01052 | ,741        | -3,1302  | 13,9336 |
|          |       | 19-25 | 2,90171  | 1,52086 | ,576        | -1,4084  | 7,2118  |
|          |       | 26-35 | 1,94419  | 1,63523 | 1,000       | -2,6901  | 6,5785  |
|          |       | 46-60 | -3,53480 | 2,53639 | 1,000       | -10,7230 | 3,6534  |
|          | 46-60 | 0-18  | 8,93651  | 3,47819 | ,108        | -,9207   | 18,7938 |
|          |       | 19-25 | 6,43651  | 2,31248 | <b>,058</b> | -,1171   | 12,9901 |
|          |       | 26-35 | 5,47899  | 2,38926 | ,227        | -1,2922  | 12,2502 |
|          |       | 36-45 | 3,53480  | 2,53639 | 1,000       | -3,6534  | 10,7230 |

\*. The mean difference is significant at the 0.05 level.

### 3. Multiple Comparisons, education groups

Bonferroni test

| Dependent Variable | Education I                 | Education J                 | Mean Difference | Std. Error | Sig.     | 95% Confidence Interval |             |
|--------------------|-----------------------------|-----------------------------|-----------------|------------|----------|-------------------------|-------------|
|                    |                             |                             | (I-J)           |            |          | Lower Bound             | Upper Bound |
| General knowledge  | Vocational                  | High school                 | -7,10563        | 4,07383    | 1,000    | -19,1801                | 4,9688      |
|                    |                             | Bachelor general            | -6,86842        | 4,71207    | 1,000    | -20,8346                | 7,0977      |
|                    |                             | Bachelor professional       | -7,52469        | 4,04267    | ,958     | -19,5068                | 4,4574      |
|                    |                             | Master or higher university | -10,48214       | 4,14064    | ,180     | -22,7546                | 1,7903      |
|                    |                             | Other                       | -,97059         | 4,80670    | 1,000    | -15,2172                | 13,2760     |
|                    | High school                 | Vocational                  | 7,10563         | 4,07383    | 1,000    | -4,9688                 | 19,1801     |
|                    |                             | Bachelor general            | ,23721          | 3,11534    | 1,000    | -8,9964                 | 9,4708      |
|                    |                             | Bachelor professional       | -,41906         | 1,96083    | 1,000    | -6,2308                 | 5,3927      |
|                    |                             | Master or higher university | -3,37651        | 2,15560    | 1,000    | -9,7655                 | 3,0125      |
|                    |                             | Other                       | 6,13505         | 3,25670    | ,911     | -3,5175                 | 15,7876     |
|                    | Bachelor general            | Vocational                  | 6,86842         | 4,71207    | 1,000    | -7,0977                 | 20,8346     |
|                    |                             | High school                 | -,23721         | 3,11534    | 1,000    | -9,4708                 | 8,9964      |
|                    |                             | Bachelor professional       | -,65627         | 3,07447    | 1,000    | -9,7687                 | 8,4562      |
|                    |                             | Master or higher university | -3,61372        | 3,20221    | 1,000    | -13,1048                | 5,8773      |
|                    |                             | Other                       | 5,89783         | 4,02661    | 1,000    | -6,0367                 | 17,8323     |
|                    | Bachelor professional       | Vocational                  | 7,52469         | 4,04267    | ,958     | -4,4574                 | 19,5068     |
|                    |                             | High school                 | ,41906          | 1,96083    | 1,000    | -5,3927                 | 6,2308      |
|                    |                             | Bachelor general            | ,65627          | 3,07447    | 1,000    | -8,4562                 | 9,7687      |
|                    |                             | Master or higher university | -2,95745        | 2,09611    | 1,000    | -9,1701                 | 3,2552      |
|                    |                             | Other                       | 6,55410         | 3,21763    | ,641     | -2,9826                 | 16,0908     |
|                    | Master or higher university | Vocational                  | 10,48214        | 4,14064    | ,180     | -1,7903                 | 22,7546     |
|                    |                             | High school                 | 3,37651         | 2,15560    | 1,000    | -3,0125                 | 9,7655      |
|                    |                             | Bachelor general            | 3,61372         | 3,20221    | 1,000    | -5,8773                 | 13,1048     |
|                    |                             | Bachelor professional       | 2,95745         | 2,09611    | 1,000    | -3,2552                 | 9,1701      |
|                    |                             | Other                       | 9,51155         | 3,33989    | ,072     | -,3876                  | 19,4107     |
| other              | Vocational                  | ,97059                      | 4,80670         | 1,000      | -13,2760 | 15,2172                 |             |
|                    | High school                 | -6,13505                    | 3,25670         | ,911       | -15,7876 | 3,5175                  |             |
|                    | Bachelor general            | -5,89783                    | 4,02661         | 1,000      | -17,8323 | 6,0367                  |             |
|                    | Bachelor professional       | -6,55410                    | 3,21763         | ,641       | -16,0908 | 2,9826                  |             |
|                    | Master or higher university | -9,51155                    | 3,33989         | ,072       | -19,4107 | ,3876                   |             |

|                       |                             |                             |            |         |          |          |         |
|-----------------------|-----------------------------|-----------------------------|------------|---------|----------|----------|---------|
| Nutrition knowledge   | Vocational                  | High school                 | 9,61972    | 7,51772 | 1,000    | -12,6621 | 31,9015 |
|                       |                             | Bachelor general            | 1,94737    | 8,69551 | 1,000    | -23,8253 | 27,7201 |
|                       |                             | Bachelor professional       | -4,03704   | 7,46021 | 1,000    | -26,1484 | 18,0743 |
|                       |                             | Master or higher university | 3,53571    | 7,64101 | 1,000    | -19,1115 | 26,1830 |
|                       |                             | Other                       | ,64706     | 8,87014 | 1,000    | -25,6432 | 26,9373 |
|                       | High school                 | Vocational                  | -9,61972   | 7,51772 | 1,000    | -31,9015 | 12,6621 |
|                       |                             | Bachelor general            | -7,67235   | 5,74895 | 1,000    | -24,7117 | 9,3670  |
|                       |                             | Bachelor professional       | -13,65676* | 3,61845 | ,003     | -24,3815 | -2,9320 |
|                       |                             | Master or higher university | -6,08400   | 3,97788 | 1,000    | -17,8741 | 5,7061  |
|                       |                             | Other                       | -8,97266   | 6,00981 | 1,000    | -26,7852 | 8,8399  |
|                       | Bachelor general            | Vocational                  | -1,94737   | 8,69551 | 1,000    | -27,7201 | 23,8253 |
|                       |                             | High school                 | 7,67235    | 5,74895 | 1,000    | -9,3670  | 24,7117 |
|                       |                             | Bachelor professional       | -5,98441   | 5,67353 | 1,000    | -22,8002 | 10,8314 |
|                       |                             | Master or higher university | 1,58835    | 5,90926 | 1,000    | -15,9261 | 19,1028 |
|                       |                             | Other                       | -1,30031   | 7,43058 | 1,000    | -23,3239 | 20,7232 |
|                       | Bachelor professional       | Vocational                  | 4,03704    | 7,46021 | 1,000    | -18,0743 | 26,1484 |
|                       |                             | High school                 | 13,65676*  | 3,61845 | ,003     | 2,9320   | 24,3815 |
|                       |                             | Bachelor general            | 5,98441    | 5,67353 | 1,000    | -10,8314 | 22,8002 |
|                       |                             | Master or higher university | 7,57275    | 3,86809 | ,771     | -3,8919  | 19,0374 |
|                       |                             | Other                       | 4,68410    | 5,93771 | 1,000    | -12,9147 | 22,2829 |
|                       | Master or higher university | Vocational                  | -3,53571   | 7,64101 | 1,000    | -26,1830 | 19,1115 |
|                       |                             | High school                 | 6,08400    | 3,97788 | 1,000    | -5,7061  | 17,8741 |
|                       |                             | Bachelor general            | -1,58835   | 5,90926 | 1,000    | -19,1028 | 15,9261 |
|                       |                             | Bachelor professional       | -7,57275   | 3,86809 | ,771     | -19,0374 | 3,8919  |
|                       |                             | Other                       | -2,88866   | 6,16334 | 1,000    | -21,1562 | 15,3789 |
|                       | other                       | Vocational                  | -,64706    | 8,87014 | 1,000    | -26,9373 | 25,6432 |
|                       |                             | High school                 | 8,97266    | 6,00981 | 1,000    | -8,8399  | 26,7852 |
|                       |                             | Bachelor general            | 1,30031    | 7,43058 | 1,000    | -20,7232 | 23,3239 |
| Bachelor professional |                             | -4,68410                    | 5,93771    | 1,000   | -22,2829 | 12,9147  |         |

|           |                             |                             |          |         |       |          |         |
|-----------|-----------------------------|-----------------------------|----------|---------|-------|----------|---------|
| Attitudes | Vocational                  | Master or higher university | 2,88866  | 6,16334 | 1,000 | -15,3789 | 21,1562 |
|           |                             | High school                 | 5,48571  | 2,49750 | ,435  | -1,9200  | 12,8914 |
|           |                             | Bachelor general            | 6,95000  | 2,97808 | ,307  | -1,8808  | 15,7808 |
|           |                             | Bachelor proffesional       | 6,43077  | 2,48144 | ,152  | -,9273   | 13,7889 |
|           |                             | Master or higher university | 7,08679  | 2,54708 | ,087  | -,4659   | 14,6395 |
|           |                             | Other                       | 2,95000  | 2,97808 | 1,000 | -5,8808  | 11,7808 |
|           | High school                 | Vocational                  | -5,48571 | 2,49750 | ,435  | -12,8914 | 1,9200  |
|           |                             | Bachelor general            | 1,46429  | 2,04715 | 1,000 | -4,6060  | 7,5346  |
|           |                             | Bachelor proffesional       | ,94505   | 1,21631 | 1,000 | -2,6616  | 4,5517  |
|           |                             | Master or higher university | 1,60108  | 1,34516 | 1,000 | -2,3877  | 5,5898  |
|           |                             | Other                       | -2,53571 | 2,04715 | 1,000 | -8,6060  | 3,5346  |
|           | Bachelor general            | Vocational                  | -6,95000 | 2,97808 | ,307  | -15,7808 | 1,8808  |
|           |                             | High school                 | -1,46429 | 2,04715 | 1,000 | -7,5346  | 4,6060  |
|           |                             | Bachelor proffesional       | -,51923  | 2,02753 | 1,000 | -6,5314  | 5,4929  |
|           |                             | Master or higher university | ,13679   | 2,10735 | 1,000 | -6,1120  | 6,3856  |
|           |                             | Other                       | -4,00000 | 2,61195 | 1,000 | -11,7451 | 3,7451  |
|           | Bachelor professional       | Vocational                  | -6,43077 | 2,48144 | ,152  | -13,7889 | ,9273   |
|           |                             | High school                 | -,94505  | 1,21631 | 1,000 | -4,5517  | 2,6616  |
|           |                             | Bachelor general            | ,51923   | 2,02753 | 1,000 | -5,4929  | 6,5314  |
|           |                             | Master or higher university | ,65602   | 1,31510 | 1,000 | -3,2436  | 4,5556  |
|           |                             | Other                       | -3,48077 | 2,02753 | 1,000 | -9,4929  | 2,5314  |
|           | Master or higher university | Vocational                  | -7,08679 | 2,54708 | ,087  | -14,6395 | ,4659   |
|           |                             | High school                 | -1,60108 | 1,34516 | 1,000 | -5,5898  | 2,3877  |
|           |                             | Bachelor general            | -,13679  | 2,10735 | 1,000 | -6,3856  | 6,1120  |
|           |                             | Bachelor proffesional       | -,65602  | 1,31510 | 1,000 | -4,5556  | 3,2436  |
|           |                             | Other                       | -4,13679 | 2,10735 | ,762  | -10,3856 | 2,1120  |
|           | other                       | Vocational                  | -2,95000 | 2,97808 | 1,000 | -11,7808 | 5,8808  |
|           |                             | High school                 | 2,53571  | 2,04715 | 1,000 | -3,5346  | 8,6060  |
|           |                             | Bachelor general            | 4,00000  | 2,61195 | 1,000 | -3,7451  | 11,7451 |

|           |                             |                             |                             |          |         |          |          |         |
|-----------|-----------------------------|-----------------------------|-----------------------------|----------|---------|----------|----------|---------|
|           |                             | Bachelor professional       | 3,48077                     | 2,02753  | 1,000   | -2,5314  | 9,4929   |         |
|           |                             | Master or higher university | 4,13679                     | 2,10735  | ,762    | -2,1120  | 10,3856  |         |
| Behaviors | Vocational                  | High school                 | 2,69412                     | 2,79090  | 1,000   | -5,5834  | 10,9717  |         |
|           |                             | Bachelor general            | -,72500                     | 3,32184  | 1,000   | -10,5773 | 9,1273   |         |
|           |                             | Bachelor professional       | ,40000                      | 2,77201  | 1,000   | -7,8215  | 8,6215   |         |
|           |                             | Master or higher university | 1,74615                     | 2,84542  | 1,000   | -6,6931  | 10,1854  |         |
|           |                             | Other                       | -2,10000                    | 3,32184  | 1,000   | -11,9523 | 7,7523   |         |
|           |                             | High school                 | Vocational                  | -2,69412 | 2,79090 | 1,000    | -10,9717 | 5,5834  |
|           |                             |                             | Bachelor general            | -3,41912 | 2,28969 | 1,000    | -10,2101 | 3,3719  |
|           |                             |                             | Bachelor professional       | -2,29412 | 1,37554 | 1,000    | -6,3738  | 1,7856  |
|           |                             |                             | Master or higher university | -,94796  | 1,51805 | 1,000    | -5,4504  | 3,5544  |
|           |                             |                             | Other                       | -4,79412 | 2,28969 | ,560     | -11,5851 | 1,9969  |
|           |                             | Bachelor general            | Vocational                  | ,72500   | 3,32184 | 1,000    | -9,1273  | 10,5773 |
|           |                             |                             | High school                 | 3,41912  | 2,28969 | 1,000    | -3,3719  | 10,2101 |
|           |                             |                             | Bachelor professional       | 1,12500  | 2,26662 | 1,000    | -5,5976  | 7,8476  |
|           |                             |                             | Master or higher university | 2,47115  | 2,35583 | 1,000    | -4,5160  | 9,4583  |
|           |                             |                             | Other                       | -1,37500 | 2,91345 | 1,000    | -10,0160 | 7,2660  |
|           |                             | Bachelor professional       | Vocational                  | -,40000  | 2,77201 | 1,000    | -8,6215  | 7,8215  |
|           |                             |                             | High school                 | 2,29412  | 1,37554 | 1,000    | -1,7856  | 6,3738  |
|           |                             |                             | Bachelor general            | -1,12500 | 2,26662 | 1,000    | -7,8476  | 5,5976  |
|           |                             |                             | Master or higher university | 1,34615  | 1,48302 | 1,000    | -3,0524  | 5,7447  |
|           |                             |                             | Other                       | -2,50000 | 2,26662 | 1,000    | -9,2226  | 4,2226  |
|           | Master or higher university | Vocational                  | -1,74615                    | 2,84542  | 1,000   | -10,1854 | 6,6931   |         |
|           |                             | High school                 | ,94796                      | 1,51805  | 1,000   | -3,5544  | 5,4504   |         |
|           |                             | Bachelor general            | -2,47115                    | 2,35583  | 1,000   | -9,4583  | 4,5160   |         |
|           |                             | Bachelor professional       | -1,34615                    | 1,48302  | 1,000   | -5,7447  | 3,0524   |         |
|           |                             | Other                       | -3,84615                    | 2,35583  | 1,000   | -10,8333 | 3,1410   |         |
|           | other                       | Vocational                  | 2,10000                     | 3,32184  | 1,000   | -7,7523  | 11,9523  |         |
|           |                             | High school                 | 4,79412                     | 2,28969  | ,560    | -1,9969  | 11,5851  |         |



|                             |         |         |       |         |         |
|-----------------------------|---------|---------|-------|---------|---------|
| Bachelor general            | 1,37500 | 2,91345 | 1,000 | -7,2660 | 10,0160 |
| Bachelor professional       | 2,50000 | 2,26662 | 1,000 | -4,2226 | 9,2226  |
| Master or higher university | 3,84615 | 2,35583 | 1,000 | -3,1410 | 10,8333 |

\*. The mean difference is significant at the 0.05 level.
